# Supplementary material for: Selection of chromosomal DNA libraries using a multiplex CRISPR system
Source: eLife. 2014 Aug 19;3:e03703. doi: 10.7554/eLife.03703 (PMC4161972; doi:10.7554/eLife.03703)
Supplement: Supplementary file 1. — (A) CRISPR-Cas screening results. (B) Potential off-target mutations identified by whole genome sequencing. (C) RNA polymerase III promoter sequences used to express sgRNAs. (D) Guide sequences used in this study. DOI: http://dx.doi.org/10.7554/eLife.03703.007 [file elife03703s001.xls]

## Sheet: Supplementary file 1A
	Supplementary file 1A. CRISPR-Cas screening results.
1	sgRNA Promoter	Strain	Target	Colonies	Confirmed
2	Glutamate	S288C 2n	URA3	1500	8
3	Glutamate	S288C 2n	URA3	1500	18
4	Glutamate	S288C 2n	URA3	1000	3
5	Glycine	S288C 2n	URA3	1600	50
6	Glycine	S288C 2n	URA3	1600	35
7	Glycine	S288C 2n	URA3	650	5
8	Histidine	S288C 2n	URA3	1100	19
9	Histidine	S288C 2n	URA3	1100	10
10	Histidine	S288C 2n	URA3	800	3
11	Phenylalanine	S288C 2n	URA3	45	45
12	Phenylalanine	S288C 2n	URA3	210	205
13	Phenylalanine	S288C 2n	URA3	280	276
14	Proline	S288C 2n	URA3	330	328
15	Proline	S288C 2n	URA3	300	295
16	Proline	S288C 2n	URA3	190	187
17	RPR1	S288C 2n	URA3	1450	35
18	RPR1	S288C 2n	URA3	1450	45
19	RPR1	S288C 2n	URA3	2000	65
20	SCR1	S288C 2n	URA3	1600	12
21	SCR1	S288C 2n	URA3	1600	17
22	SCR1	S288C 2n	URA3	600	1
23	SNR6	S288C 2n	URA3	1200	0
24	SNR6	S288C 2n	URA3	1200	0
25	SNR6	S288C 2n	URA3	1200	0
26	SNR52	S288C 2n	URA3	79	72
27	SNR52	S288C 2n	URA3	152	143
28	SNR52	S288C 2n	URA3	85	84
29	Tyrosine	S288C 2n	URA3	66	63
30	Tyrosine	S288C 2n	URA3	78	77
31	Tyrosine	S288C 2n	URA3	38	38
32	Valine	S288C 2n	URA3	650	600
33	Valine	S288C 2n	URA3	650	600
34	Valine	S288C 2n	URA3	23	21
35	Tyrosine	S288C 2n	URA3	18	18
36	Tyrosine	S288C 2n	QCR9	18	18
37	Tyrosine	S288C 2n	QCR6	17	18
38	Tyrosine	S288C 2n	COX10	16	18
39	Tyrosine	S288C 2n	HIS2	18	18
40	Tyrosine	S288C 2n	ARG80	18	18
41	Tyrosine	S288C 2n	TRP1	18	18
42	Tyrosine	S288C 2n	CAN1	17	18
43	Tyrosine	S288C 2n	MET6	16	18
44	Tyrosine	S288C 2n	LEU2	0	0
45	Tyrosine	S288C 2n	LYP1	18	18
46	Tyrosine	S288C 2n	LEU2-2	18	18
47	SNR52-BC	ATCC4124	URA3	24	2
48	SNR52-BC	ATCC4124	URA3	14	1
49	SNR52-BC	ATCC4124	URA3	23	0
50	Tyrosine-BC	ATCC4124	URA3	600	13
51	Tyrosine-BC	ATCC4124	URA3	650	11
52	Tyrosine-BC	ATCC4124	URA3	750	11
53	Proline-BC	ATCC4124	URA3	36	34
54	Proline-BC	ATCC4124	URA3	54	53
55	Proline-BC	ATCC4124	URA3	49	48
56	Phenylalanine-BC	ATCC4124	URA3	38	38
57	Phenylalanine-BC	ATCC4124	URA3	16	16
58	Phenylalanine-BC	ATCC4124	URA3	18	18
59	SNR52-BC	S288C 2n	URA3	79	72
60	SNR52-BC	S288C 2n	URA3	152	143
61	SNR52-BC	S288C 2n	URA3	85	84
62	Tyrosine-BC	S288C 2n	URA3	66	63
63	Tyrosine-BC	S288C 2n	URA3	78	77
64	Tyrosine-BC	S288C 2n	URA3	38	38
65	Proline-BC	S288C 2n	URA3	330	328
66	Proline-BC	S288C 2n	URA3	300	295
67	Proline-BC	S288C 2n	URA3	190	187
68	Phenylalanine-BC	S288C 2n	URA3	210	205
69	Phenylalanine-BC	S288C 2n	URA3	280	276
70	Phenylalanine-BC	S288C 2n	URA3	260	256
71	SNR52-NAT	ATCC4124	URA3 + NATR	27	0
72	SNR52-NAT	ATCC4124	URA3 + NATR	38	0
73	SNR52-NAT	ATCC4124	URA3 + NATR	32	0
74	Tyrosine-NAT	ATCC4124	URA3 + NATR	700	2
75	Tyrosine-NAT	ATCC4124	URA3 + NATR	1000	6
76	Tyrosine-NAT	ATCC4124	URA3 + NATR	1000	4
77	Tyrosine-NAT	ATCC4124	URA3 + NATR	1000	3
78	Proline-NAT	ATCC4124	URA3 + NATR	5	3
79	Proline-NAT	ATCC4124	URA3 + NATR	9	7
80	Proline-NAT	ATCC4124	URA3 + NATR	13	7
81	Proline-NAT	ATCC4124	URA3 + NATR	6	3
82	Proline-NAT	ATCC4124	URA3 + NATR	12	10
83	Proline-NAT	ATCC4124	URA3 + NATR	7	6
84	Proline-NAT	ATCC4124	URA3 + NATR	15	12
85	Phenylalanine-NAT	ATCC4124	URA3 + NATR	4	2
86	Phenylalanine-NAT	ATCC4124	URA3 + NATR	7	5
87	Phenylalanine-NAT	ATCC4124	URA3 + NATR	6	4
88	Phenylalanine-NAT	ATCC4124	URA3 + NATR	8	4
89	Phenylalanine-NAT	ATCC4124	URA3 + NATR	3	3
90	Phenylalanine-NAT	ATCC4124	URA3 + NATR	11	7
91	Phenylalanine-NAT	ATCC4124	URA3 + NATR	15	10
92	SNR52-NAT	S288C	URA3 + NATR	35	21
93	SNR52-NAT	S288C	URA3 + NATR	52	38
94	SNR52-NAT	S288C	URA3 + NATR	56	36
95	SNR52-NAT	S288C	URA3 + NATR	85	57
96	SNR52-NAT	S288C	URA3 + NATR	25	10
97	Tyrosine-NAT	S288C	URA3 + NATR	63	51
98	Tyrosine-NAT	S288C	URA3 + NATR	88	72
99	Tyrosine-NAT	S288C	URA3 + NATR	53	40
100	Tyrosine-NAT	S288C	URA3 + NATR	34	25
101	Proline-NAT	S288C	URA3 + NATR	12	10
102	Proline-NAT	S288C	URA3 + NATR	20	18
103	Proline-NAT	S288C	URA3 + NATR	26	21
104	Phenylalanine-NAT	S288C	URA3 + NATR	23	15
105	Phenylalanine-NAT	S288C	URA3 + NATR	22	16
106	Phenylalanine-NAT	S288C	URA3 + NATR	7	7
107	Tyrosine	S288C 1n	URA3+LYP1	97	83
108	Tyrosine	S288C 2n	URA3+LYP1	108	46
109	Tyrosine	S288C 1n	URA3+LYP1+COX10	108	87
110	Tyrosine	S288C 2n	URA3+LYP1+COX10	96	18
111	Tyrosine (- HDV)	S288C 2n	URA3+LYP1	108	4
112	Tyrosine (- HDV)	S288C 2n	URA3	108	102

## Sheet: Supplementary file 1B
Supplementary file 1B. Potential off target mutations identified by whole genome sequencing
Variant #	Chromosome	Position	Reference	Change	Variant Type	Target Sequence	URA3 Base Pair Matches	LYP1 Base Pair Matches	Samples
1	chrII	654973	G	C	SNP	CAATTATCCGATCATTCTAA	4	NA	URA3-3
1	chrII	654973	G	C	SNP	GAAAAGGAAAAAGATGAAGA	4	NA	URA3-3
1	chrII	654973	G	C	SNP	TAGTGAGCCGTTAGAATGAT	8	NA	URA3-3
1	chrII	654973	G	C	SNP	TTCTAACGGCTCACTAGAAA	7	NA	URA3-3
2	chrIII	27658	T	TA	INS	AAAAAAAAAAAAAAAAAAGA	8	NA	URA3-3
2	chrIII	27658	T	TA	INS	GGTAAAACAGCGTTTACAAT	3	NA	URA3-3
2	chrIII	27658	T	TA	INS	TTTTTTTTTTTTTTTACTTT	4	NA	URA3-3
3	chrIV	242423	G	A	SNP	AAAATGATCAGACGTTATAA	NA	8	LYP1-2
3	chrIV	242423	G	A	SNP	GACGTTATAATGGAAAAGAA	NA	8	LYP1-2
4	chrIV	538215	A	G	SNP	ACCAGTAATCCAATCATGCA	NA	4	LYP1-1
4	chrIV	538215	A	G	SNP	AGATTATCATGGATATTAGA	NA	3	LYP1-1
4	chrIV	538215	A	G	SNP	CATGGCAAACGAGATTATCA	NA	8	LYP1-1
4	chrIV	538215	A	G	SNP	GCCATGCATGATTGGATTAC	NA	4	LYP1-1
4	chrIV	538215	A	G	SNP	GGTATGTAATGCCATGATCA	NA	7	LYP1-1
4	chrIV	538215	A	G	SNP	TCTCGTTTGCCATGCATGAT	NA	4	LYP1-1
5	chrIV	681294	A	T	SNP	GATAGTGTATTCTGTAGTTG	NA	6	LYP1-3
5	chrIV	681294	A	T	SNP	TTACTCTGATTAGAAGTTTC	NA	3	LYP1-3
5	chrIV	681294	A	T	SNP	TTTACTCTGATTAGAAGTTT	NA	6	LYP1-3
6	chrIV	944262	A	T	SNP	AACGAAATAAGTGGCCTTCA	NA	3	LYP1-1
6	chrIV	944262	A	T	SNP	AAGGCATATAACGAAATAAG	NA	7	LYP1-1
6	chrIV	944262	A	T	SNP	GATAAAGGTCTTTGTTGTCG	NA	6	LYP1-1
6	chrIV	944262	A	T	SNP	GTGGAAATTGATCTCCTTGA	NA	4	LYP1-1
6	chrIV	944262	A	T	SNP	TAAACATATTTCTGAAATGA	NA	7	LYP1-1
7	chrIV	1525391	GT	G	DEL	CTTAGGCTTAGGCTTCTCTC	2	4	URA3-1,URA3-2,URA3-3,URA3-5,LYP1-4
7	chrIV	1525391	GT	G	DEL	CTTAGGCTTCTCTCTGGTGT	3	6	URA3-1,URA3-2,URA3-3,URA3-5,LYP1-4
7	chrIV	1525391	GT	G	DEL	GCTTAGGCTTCTCTCTGGTG	5	4	URA3-1,URA3-2,URA3-3,URA3-5,LYP1-4
7	chrIV	1525391	GT	G	DEL	GGTGTGGGTGTGTGGGTGTG	3	3	URA3-1,URA3-2,URA3-3,URA3-5,LYP1-4
7	chrIV	1525391	GT	G	DEL	GGTGTGTGGGTGTGTGGGTG	5	3	URA3-1,URA3-2,URA3-3,URA3-5,LYP1-4
7	chrIV	1525391	GT	G	DEL	GTGGGTGTGTGGGTGTGGTG	4	2	URA3-1,URA3-2,URA3-3,URA3-5,LYP1-4
7	chrIV	1525391	GT	G	DEL	GTGTGGGTGTGGGTGTGGTG	5	1	URA3-1,URA3-2,URA3-3,URA3-5,LYP1-4
7	chrIV	1525391	GT	G	DEL	GTGTGGGTGTGGTGTGGGTG	6	0	URA3-1,URA3-2,URA3-3,URA3-5,LYP1-4
7	chrIV	1525391	GT	G	DEL	GTGTGGGTGTGTGGGTGTGT	6	2	URA3-1,URA3-2,URA3-3,URA3-5,LYP1-4
7	chrIV	1525391	GT	G	DEL	GTGTGGTGTGGGTGTGGGTG	5	1	URA3-1,URA3-2,URA3-3,URA3-5,LYP1-4
7	chrIV	1525391	GT	G	DEL	TCTCTCTGGTGTGGGTGTGT	6	3	URA3-1,URA3-2,URA3-3,URA3-5,LYP1-4
7	chrIV	1525391	GT	G	DEL	TGGGTGTGTGGGTGTGGTGT	5	2	URA3-1,URA3-2,URA3-3,URA3-5,LYP1-4
7	chrIV	1525391	GT	G	DEL	TGTGGGTGTGGGTGTGGTGT	3	3	URA3-1,URA3-2,URA3-3,URA3-5,LYP1-4
7	chrIV	1525391	GT	G	DEL	TGTGGGTGTGGTGTGGGTGT	2	3	URA3-1,URA3-2,URA3-3,URA3-5,LYP1-4
7	chrIV	1525391	GT	G	DEL	TTCTCTCTGGTGTGGGTGTG	5	3	URA3-1,URA3-2,URA3-3,URA3-5,LYP1-4
8	chrIV	1525394	G	T	SNP	CTTAGGCTTAGGCTTCTCTC	2	4	URA3-1,URA3-3,URA3-5,LYP1-4
8	chrIV	1525394	G	T	SNP	CTTAGGCTTCTCTCTGGTGT	3	6	URA3-1,URA3-3,URA3-5,LYP1-4
8	chrIV	1525394	G	T	SNP	GCTTAGGCTTCTCTCTGGTG	5	4	URA3-1,URA3-3,URA3-5,LYP1-4
8	chrIV	1525394	G	T	SNP	GGTGTGGGTGTGTGGGTGTG	3	3	URA3-1,URA3-3,URA3-5,LYP1-4
8	chrIV	1525394	G	T	SNP	GGTGTGTGGGTGTGTGGGTG	5	3	URA3-1,URA3-3,URA3-5,LYP1-4
8	chrIV	1525394	G	T	SNP	GTGGGTGTGTGGGTGTGGTG	4	2	URA3-1,URA3-3,URA3-5,LYP1-4
8	chrIV	1525394	G	T	SNP	GTGTGGGTGTGGGTGTGGTG	5	1	URA3-1,URA3-3,URA3-5,LYP1-4
8	chrIV	1525394	G	T	SNP	GTGTGGGTGTGGTGTGGGTG	6	0	URA3-1,URA3-3,URA3-5,LYP1-4
8	chrIV	1525394	G	T	SNP	GTGTGGGTGTGTGGGTGTGT	6	2	URA3-1,URA3-3,URA3-5,LYP1-4
8	chrIV	1525394	G	T	SNP	GTGTGGTGTGGGTGTGGGTG	5	1	URA3-1,URA3-3,URA3-5,LYP1-4
8	chrIV	1525394	G	T	SNP	TCTCTCTGGTGTGGGTGTGT	6	3	URA3-1,URA3-3,URA3-5,LYP1-4
8	chrIV	1525394	G	T	SNP	TGGGTGTGTGGGTGTGGTGT	5	2	URA3-1,URA3-3,URA3-5,LYP1-4
8	chrIV	1525394	G	T	SNP	TGTGGGTGTGGGTGTGGTGT	3	3	URA3-1,URA3-3,URA3-5,LYP1-4
8	chrIV	1525394	G	T	SNP	TGTGGGTGTGGTGTGGGTGT	2	3	URA3-1,URA3-3,URA3-5,LYP1-4
8	chrIV	1525394	G	T	SNP	TTCTCTCTGGTGTGGGTGTG	5	3	URA3-1,URA3-3,URA3-5,LYP1-4
9	chrIV	1525401	T	TGTG	INS	CTTAGGCTTAGGCTTCTCTC	NA	4	LYP1-4
9	chrIV	1525401	T	TGTG	INS	CTTAGGCTTCTCTCTGGTGT	NA	6	LYP1-4
9	chrIV	1525401	T	TGTG	INS	GCTTAGGCTTCTCTCTGGTG	NA	4	LYP1-4
9	chrIV	1525401	T	TGTG	INS	GGGTGTGGTGTGGGTGTGGT	NA	4	LYP1-4
9	chrIV	1525401	T	TGTG	INS	GGTGTGGGTGTGTGGGTGTG	NA	3	LYP1-4
9	chrIV	1525401	T	TGTG	INS	GGTGTGTGGGTGTGTGGGTG	NA	3	LYP1-4
9	chrIV	1525401	T	TGTG	INS	GTGGGTGTGTGGGTGTGGTG	NA	2	LYP1-4
9	chrIV	1525401	T	TGTG	INS	GTGTGGGTGTGGGTGTGGTG	NA	1	LYP1-4
9	chrIV	1525401	T	TGTG	INS	GTGTGGGTGTGGTGTGGGTG	NA	0	LYP1-4
9	chrIV	1525401	T	TGTG	INS	GTGTGGGTGTGTGGGTGTGT	NA	2	LYP1-4
9	chrIV	1525401	T	TGTG	INS	GTGTGGTGTGGGTGTGGGTG	NA	1	LYP1-4
9	chrIV	1525401	T	TGTG	INS	TCTCTCTGGTGTGGGTGTGT	NA	3	LYP1-4
9	chrIV	1525401	T	TGTG	INS	TGGGTGTGGTGTGGGTGTGG	NA	1	LYP1-4
9	chrIV	1525401	T	TGTG	INS	TGGGTGTGTGGGTGTGGTGT	NA	2	LYP1-4
9	chrIV	1525401	T	TGTG	INS	TGTGGGTGTGGGTGTGGTGT	NA	3	LYP1-4
9	chrIV	1525401	T	TGTG	INS	TGTGGGTGTGGTGTGGGTGT	NA	3	LYP1-4
9	chrIV	1525401	T	TGTG	INS	TTCTCTCTGGTGTGGGTGTG	NA	3	LYP1-4
10	chrVII	140313	T	TA	INS	AAAAAAAAAAAAAAAAAAAA	8	NA	URA3-5
10	chrVII	140313	T	TA	INS	AAAAAAAAAAAAAAAAAAAC	8	NA	URA3-5
10	chrVII	140313	T	TA	INS	AAAACATTAAAAAAAAAAAA	7	NA	URA3-5
11	chrVII	394879	TAAAAAAAATCAAAAAAACAGGAAA	T	DEL	AAAAAAAAATCATGAGTGAG	6	NA	URA3-5
11	chrVII	394879	TAAAAAAAATCAAAAAAACAGGAAA	T	DEL	ATAAAAAAAATCAAAAAAAC	6	NA	URA3-5
12	chrVII	530034	A	C	SNP	ATGAAGAGGAAGATGTGGAG	8	NA	URA3-3
12	chrVII	530034	A	C	SNP	TGAAGAGGAAGATGTGGAGA	5	NA	URA3-3
12	chrVII	530034	A	C	SNP	TGAGGATGAGGATGATGATG	4	NA	URA3-3
12	chrVII	530034	A	C	SNP	TGATGATGATGATGAGGATG	5	NA	URA3-3
12	chrVII	530034	A	C	SNP	TGATGATGATGATGATGATG	5	NA	URA3-3
13	chrVIII	1846	A	G	SNP	ACTAGTCCTGACGTTGATGC	4	NA	URA3-3,URA3-5
13	chrVIII	1846	A	G	SNP	ACTAGTCCTGACGTTGGTGC	5	NA	URA3-3,URA3-5
13	chrVIII	1846	A	G	SNP	AGTAGCACTAGTCCTGACGT	3	NA	URA3-3,URA3-5
13	chrVIII	1846	A	G	SNP	CCACTGCCAGCACCAACGTC	6	NA	URA3-3,URA3-5
13	chrVIII	1846	A	G	SNP	CTACTGCCAGCATCAACGTC	5	NA	URA3-3,URA3-5
14	chrIX	23185	C	CG	INS	GAGAAGCACTAGTTGCGTGA	5	NA	URA3-4
14	chrIX	23185	C	CG	INS	GTGACAGTAGTGTATGACTT	3	NA	URA3-4
14	chrIX	23185	C	CG	INS	GTGACGGTTGAAGTAGCTTC	3	NA	URA3-4
15	chrIX	23262	AC	A	DEL	AGAAACCAGTGCTGCCCCTA	6	NA	URA3-3
15	chrIX	23262	AC	A	DEL	AGGACATACACTACTGCCAC	6	NA	URA3-3
15	chrIX	23262	AC	A	DEL	CATCACCATTGAGTAACCAG	4	NA	URA3-3
15	chrIX	23262	AC	A	DEL	GCAGTAGTGTATGTCCTTAG	6	NA	URA3-3
15	chrIX	23262	AC	A	DEL	GGCAGTAGTGTATGTCCTTA	2	NA	URA3-3
15	chrIX	23262	AC	A	DEL	TACTGCCACTGGTTACTCAA	3	NA	URA3-3
15	chrIX	23262	AC	A	DEL	TGGCAGTAGTGTATGTCCTT	5	NA	URA3-3
15	chrIX	23262	AC	A	DEL	TTACTCAATGGTGATGACAA	2	NA	URA3-3
16	chrIX	23282	TC	T	DEL	AGAAACCAGTGCTGCCCCTA	6	4	URA3-3,LYP1-3
16	chrIX	23282	TC	T	DEL	AGGACATACACTACTGCCAC	6	4	URA3-3,LYP1-3
16	chrIX	23282	TC	T	DEL	CATCACCATTGAGTAACCAG	4	7	URA3-3,LYP1-3
16	chrIX	23282	TC	T	DEL	GCAGTAGTGTATGTCCTTAG	6	1	URA3-3,LYP1-3
16	chrIX	23282	TC	T	DEL	GGCAGTAGTGTATGTCCTTA	2	5	URA3-3,LYP1-3
16	chrIX	23282	TC	T	DEL	TATGTCCTTAGGGGCAGCAC	7	3	URA3-3,LYP1-3
16	chrIX	23282	TC	T	DEL	TGGCAGTAGTGTATGTCCTT	5	4	URA3-3,LYP1-3
17	chrXI	385103	C	CTT	INS	AAAAAAAAAAAAAAAAGAAT	10	10	URA3-3,LYP1-1
18	chrXII	552	AT	A	DEL	ACACGAGGGTACCATGCTGA	NA	3	LYP1-1
18	chrXII	552	AT	A	DEL	ATAGCGAATGATGTTCCAGA	NA	4	LYP1-1
18	chrXII	552	AT	A	DEL	ATTATATCAAATCTACCGTC	NA	4	LYP1-1
18	chrXII	552	AT	A	DEL	GGGTACCATGCTGATGGTAG	NA	5	LYP1-1
18	chrXII	552	AT	A	DEL	GGTAGCGGTTCACAAAGAGC	NA	6	LYP1-1
19	chrXII	11237	C	CACACACA	INS	GGGTGTGGGTGTGTGTGTGT	5	NA	URA3-4
19	chrXII	11237	C	CACACACA	INS	GGGTGTGTGTGTGTGGGTGT	5	NA	URA3-4
19	chrXII	11237	C	CACACACA	INS	GTGGGTGTGGTGTGTGGGTG	5	NA	URA3-4
19	chrXII	11237	C	CACACACA	INS	GTGTGTGGGTGTGGTGTGTG	5	NA	URA3-4
19	chrXII	11237	C	CACACACA	INS	GTGTGTGGGTGTGTGTGTGT	5	NA	URA3-4
19	chrXII	11237	C	CACACACA	INS	GTGTGTGTGGGTGTGGGTGT	5	NA	URA3-4
19	chrXII	11237	C	CACACACA	INS	TGGGTGTGGGTGTGTGTGTG	5	NA	URA3-4
19	chrXII	11237	C	CACACACA	INS	TGGGTGTGTGTGTGTGGGTG	5	NA	URA3-4
19	chrXII	11237	C	CACACACA	INS	TGTGTGGGTGTGGTGTGTGT	3	NA	URA3-4
19	chrXII	11237	C	CACACACA	INS	TGTGTGTGGGTGTGTGTGTG	4	NA	URA3-4
19	chrXII	11237	C	CACACACA	INS	TGTGTGTGTGGGTGTGGGTG	4	NA	URA3-4
20	chrXIV	415071	C	T	SNP	AAAAAAAAAAAAAAGAAAAA	8	9	URA3-1,URA3-3,URA3-5,LYP1-1,LYP1-4
21	chrXIV	415088	C	T	SNP	CATAGAGTCTAGATTCGAAA	4	7	URA3-1,URA3-3,LYP1-2,LYP1-3,LYP1-4

## Sheet: Supplementary file 1C
	Supplementary file 1C. RNA polymerase III promoter sequences used to express sgRNAs.
tRNAGlu	TCCATTTCTCAGTGACATTCTCACTAGATGAGCGTTTTTGAGAATAATGCTAACATTTGGTAAGGTATGAAATAAAATGCGATATCCTCCGTAGTTGTCGTCCGATATAGTGTAACGGCTATCACATCACGCTTTCACCGTGGAGACCGGGGTTCGACTCCCCGTATCGGAG
tRNAGly	GTTATAAGGTTGTTTCATATGTGTTTTATGAACGTTCAGGATGACGTATTGTCATACTGACGTATCTCATTTTGAGATACAACACTTCCAAGAAATAAGCGCAAGTGGTTTAGTGGTAAAATCCAACGTTGCCATCGTTGGGCCCCCGGTTCGATTCCGGGCTTGCGCA
tRNAHis	TGTACATGGAGACAATTGCACAAAGATAATGAAGCTCCAAAATTATTCAGTATCTATTGAGTATATATAACCTTGAAAAGGTTTTATTTTATATAAGTTCGCCATCTTAGTATAGTGGTTAGTACACATCGTTGTGGCCGATGAAACCCTGGTTCGATTCTAGGAGATGGCA
tRNAPhe	GTGCTTCAGTATTACATTTTTTGCCTTCAACGCCTTGATTGTTCTATTTTTGCTAATAATAAATCTATTTCATCGGACTAAAAGTCCATTAGTTGTAAGCGGATTTAGCTCAGTTGGGAGAGCGCCAGACTGAAGAAAAACTTCGGTCAAGTCATCTGGAGGTCCTGTGTTCGATCCACAGAATTCGCA
tRNAPro	TCCGTAGTCTAAATGAGTTACGTACGAAAGGGAGCCAAAAGCAATCTGACCAATTTGTATATATATACATCTATCCGAAAAGGAAGACATCAATTAGTACGGGCGTGTGGTCTAGTGGTATGATTCTCGCTTTGGGCGACTTCCTGATTAAACAGGAAGACAAAGCATGCGAGAGGCCCTGGGTTCAATTCCCAGCTCGCCCC
tRNATyr	GTATATGTGTTATGTAGTATACTCTTTCTTCAACAATTAAATACTCTCGGTAGCCAAGTTGGTTTAAGGCGCAAGACTGTAATTTATCACTACGAAATCTTGAGATCGGGCGTTCGACTCGCCCCCGGGAGA
tRNAVal	GAGCAATGATATTTTAGAGCTTCATCTCCACAATTTCATGTGTAAATCTTAAGAATTGTAGATATATTCTATTTTTTAATGAAACTTTTTCAACAAATTAGGTTTCGTGGTCTAGTCGGTTATGGCATCTGCTTAACACGCAGAACGTCCCCAGTTCGATCCTGGGCGAAATCA
SNR52	TCTTTGAAAAGATAATGTATGATTATGCTTTCACTCATATTTATACAGAAACTTGATGTTTTCTTTCGAGTATATACAAGGTGATTACATGTACGTTTGAAGTACAACTCTAGATTTTGTAGTGCCCTCTTGGGCTAGCGGTAAAGGTGCGCATTTTTTCACACCCTACAATGTTCTGTTCAAAAGATTTTGGTCAAACGCTGTAGAAGTGAAAGTTGGTGCGCATGTTTCGGCGTTCGAAACTTCTCCGCAGTGAAAGATAAATGATC
SNR6	ATTCATTATCCTATTACATTATCAATCCTTGCATTTCAGCTTCCATTAGACTTAATGACTGTTTCTCAATTTTTATGTCATCTTCCTGGACCTCATGTGATACTATACCAGTAGCATGAATACTACTGAATCGATGATACTTTAGAGTTTCATTGCAACAGTTTCAACACAGCCTGGCATGAACAGTGGTAAAAGTATTTCGTCCACTATTTTCGGCTACTATAAATAAATGTTTTTTTCGCAACTATGT
RPR1	CCTCTTCTTATTGGCCGGCTGTCTCTATACTCCCCTATAGTCTGTTTCTTTTCGTTTCGATTGTTTTACGTTTGAGGCCTCGTGGCGCACATGGTACGCTGTGGTGCTCGCGGCTGGGAACGAAACTCTGGGAGCTGCGATTGGCA
SCR1	AGGCTGTAATGGCTTTCTGGTGGGATGGGATACGTTGAGAATTCTGGCCGAGGAACAAATCCTTCCTCGCGGCTAGACACGGATTGCACGCCCTTTGGGCAAGGGATAGTTCTCTATTCCGCACCGTGCCCTGTTGTGGCAACCGTCTTTCCTCCGTCGTAAATTTGTCCTGGGCAGAGCTGTCTGCCCGGAGGCGGGAGAGTCCGTTCTGAAGTGTCCCGGCTATAATAAATCGATCTTTGCGGGCAGCCCGTTGGCAGGAGGCGTGAGGAATCCGTCTCTCTGTCTGGTGCGGCAAGGTAGTTCTGGGTCCTTAGGGGCTCCACCTTCACCGCTGTTAGGGGAGTTTTATCCAGCGTCAGCAAAGGTGACCCGTGATGGAGGCGGCCGGGATAGCAC…

## Sheet: Supplementary file 1D
	Supplementary file 1D. 20-nucleotide guide sequences used for Cas9 screening.
Targeted locus	Guide sequence (5'-3')
URA3	ACGTTACAGAAAAGCAGGCT
QCR9	CAGGCTAAAAATGTTATCCG
QCR6	TAACGAGCAGCATGAAGAAA
COX10	ATAGAATTTACTCCCAATTT
HIS2	AGAGCACATACCAAGAATTG
ARG80	CCAGTTGAGAAACCAATTAC
TRP1	ATGTCTGTTATTAATTTCAC
CAN1	GATACGTTCTCTATGGAGGA
MET6	TCCAAACAGAGAATTAAAGA
LEU2	GATTTCGAAAATCATTTAAT
LYP1	CATAATAACGTCCAATAAAT
LEU2-2	AGTGCAAAGAATCACAAGAA
